# Supplementary material
Source: Royal Society of Chemistry journal article supplement (doi:10.1039/d6nj01030j)
Supplement: d6nj01030j1.pdf [file d6nj01030j1.pdf]

## Supporting Information

### **A Gas-Templated CeO<sub>2</sub> Nanoparticle Coating with Tailored Defects for Enhanced UV Durability of PET Films**

Liang Zhu <sup>a,\*</sup>, Yulei Liu <sup>a</sup>, Jianyong Huang <sup>a</sup>, Liangbin Li <sup>b,\*</sup>, Changfeng Liu <sup>a</sup>,

Haichao Qi <sup>a</sup>, Jingbin Hou <sup>a</sup>, Chao Li <sup>a</sup>, Heng Li <sup>a</sup>

<sup>a</sup> *China Lucky Film Group Corporation, Baoding, 071054, PR China*

<sup>b</sup> *University of Science and Technology of China, Hefei, 230026, PR China*

\* Corresponding Authors.

Emails: [zhuli12@mail.ustc.edu.cn](mailto:zhuli12@mail.ustc.edu.cn) (L. Zhu); [lbli@ustc.edu.cn](mailto:lbli@ustc.edu.cn) (L. Li)

## 1. Experimental section

### 1.1. Chemicals

Cerium nitrate ( $\geq 99.5\%$ ), glucose ( $\geq 98\%$ ), urea ( $\geq 99\%$ ), isopropanol ( $\geq 99.7\%$ ) and ethanol (99.7%) were commercially available and used without further purification. Octa(3-glycidyoxypropyl) polyhedral oligomeric silsesquioxane (GPOSS) was supplied by Hybrid Plastics, Inc; F127 (approximate molecular weight 12600) and triphenylsulfonium hexafluoroantimonate salts (TPS-HFAS, 50% purity in propylene carbonate) were purchased from Sigma-Aldrich; Polyethylene terephthalate (PET) was procured from Hefei Lucky Science & Technology Industry Co., Ltd. Deionized water with a resistivity of  $18.25 \text{ M}\Omega\cdot\text{cm}$  was used in all reactions.

### 1.2. Materials Characterization

Powder X-ray diffraction (XRD) patterns were acquired using a D/max-TTR III diffractometer with Cu K $\alpha$  radiation (40 kV, 200 mA). Morphological characterization was carried out by field-emission scanning electron microscopy (FESEM, Hitachi S-4800) and transmission electron microscopy (TEM, JEM-2100). High-angle annular dark-field scanning transmission electron microscopy (HAADF-STEM) imaging and elemental mapping were performed using a spherical aberration-corrected FEI Titan G2 80-200 ChemiSTEM. Fourier-transform infrared (FT-IR) spectroscopy was conducted on an IRPrestige-21 spectrometer, covering the wavenumber range of  $550\text{-}4000 \text{ cm}^{-1}$ . X-ray photoelectron spectroscopy (XPS) measurements were obtained on an ESCALAB 250Xi spectrometer. UV-vis diffuse reflectance spectra (DRS) were recorded with a Hitachi U-3900 spectrophotometer. The Raman spectra were collected on a Bruker SENTERRA dispersive Raman microscope. The metal ions existing in the solution were analyzed by inductively coupled plasma mass spectrometry (ICP-MS) using a Thermo Fisher iCAP Pro. The specific surface area was analyzed by the Brunauer-Emmett-Teller method. The specific surface area was determined by the Brunauer-Emmett-Teller (BET) method via  $\text{N}_2$  adsorption isotherms measured at 77 K using a Micromeritics ASAP 2020 surface area. The photoluminescence (PL) spectra were recorded on a Hitachi F-4500

fluorescence spectrophotometer and a Horiba Fluoromax Plus spectrometer. Thermogravimetric analysis (TGA) was performed on a Mettler Toledo TGA/DSC1/1100SF analyzer under a flowing nitrogen atmosphere, with the temperature ranging from 50 to 700 °C. The zeta potentials of CeO<sub>2</sub> NPs and CeO<sub>2</sub>-B were measured using a Malvern Zetasizer Nano ZS90 spectrometer at room temperature. Each sample was dispersed in deionized water at a concentration of 0.2 mg mL<sup>-1</sup> and ultrasonicated for 30 min before measurement to ensure uniform dispersion.

**Table S1** The haze date of pristine PET and CeO<sub>2</sub> NPs/PET.

| Samples                  | Haze (%) |
|--------------------------|----------|
| pristine PET             | 1.3      |
| CeO <sub>2</sub> NPs/PET | 1.7      |

**Table S2** Comparison of UV-blocking performance of various material systems for polymer substrates.

| Polymer substrate | UV blocking agents                  | UV cutoff (nm) | Visible transmittance | Photostability | Other functional properties  | Ref. |
|-------------------|-------------------------------------|----------------|-----------------------|----------------|------------------------------|------|
| PET film          | ZnO thin film                       | ~370           | 53%                   | /              | /                            | 1    |
| PET film          | ZnTi-LDH/DL-1                       | ~375           | ~60%                  | /              | Enhanced mechanical property | 2    |
| PET film          | ZnO-TiO <sub>2</sub> silane-Tinuvin | ~350           | 90%                   | /              | Enhanced hydrophobicity      | 3    |
| PET film          | SiO <sub>2</sub>                    | ~325           | 90%                   | /              | Improved storage modulus     | 4    |
| PET nonwovens     | PVDF-SiO <sub>2</sub> -CT           | ~355           | /                     | /              | /                            | 5    |
| PET fabrics       | ZnO NPs                             | ~350           | /                     | /              | Antibacterial                | 6    |
| PET fabric        | Cowpea proteins                     | ~355           | /                     | /              | Enhanced wettability         | 7    |
| Glass             | F <sup>-</sup> doped                | 350            | 80% (at               | /              | /                            | 8    |

|          | CeO <sub>2</sub>      |      | 500 nm) |                                |                                                   |                  |
|----------|-----------------------|------|---------|--------------------------------|---------------------------------------------------|------------------|
| Glass    | Nano-CeO <sub>2</sub> | ~350 | ~90%    | 36 h                           | Enhanced thermal stability                        | 9                |
| PMMA     | CeO <sub>2</sub> NPs  | ~365 | 92%     | /                              | /                                                 | 10               |
| PET film | CeO <sub>2</sub> NPs  | ~360 | ~86%    | 100 h, transmittance unchanged | Enhanced thermal stability and scratch resistance | <b>This work</b> |

**Table S3** The loading amount of CeO<sub>2</sub> in CeO<sub>2</sub> NPs/PET before and after immersed in deionized water for 10 days.

| Samples                           | The loading amount of CeO <sub>2</sub> (wt%) |
|-----------------------------------|----------------------------------------------|
| CeO <sub>2</sub> NPs/PET (before) | 9.4                                          |
| CeO <sub>2</sub> NPs/PET (after)  | 9.1                                          |

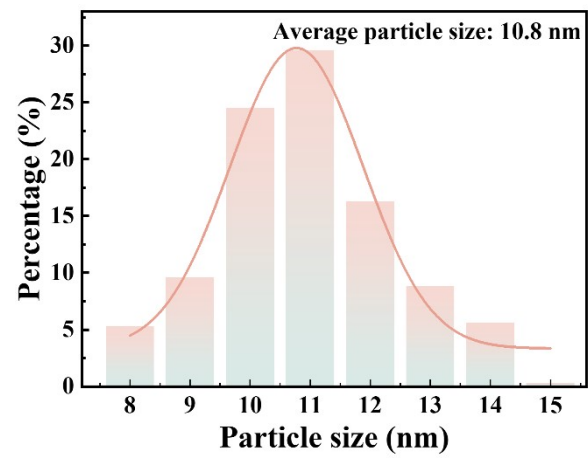

**Fig. S1** Particle size distribution of CeO<sub>2</sub> NPs.

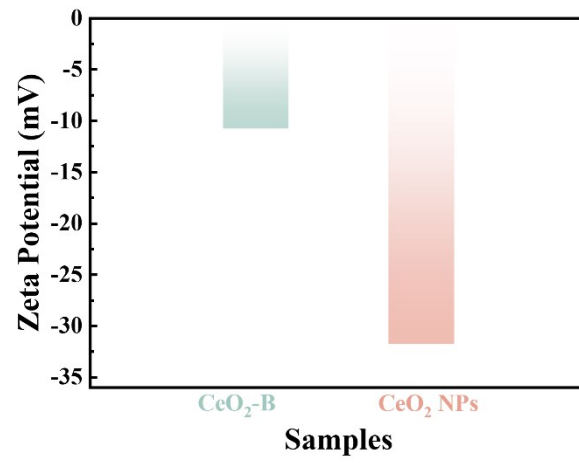

**Fig. S2** Zeta potential of CeO<sub>2</sub> NPs and CeO<sub>2</sub>-B.

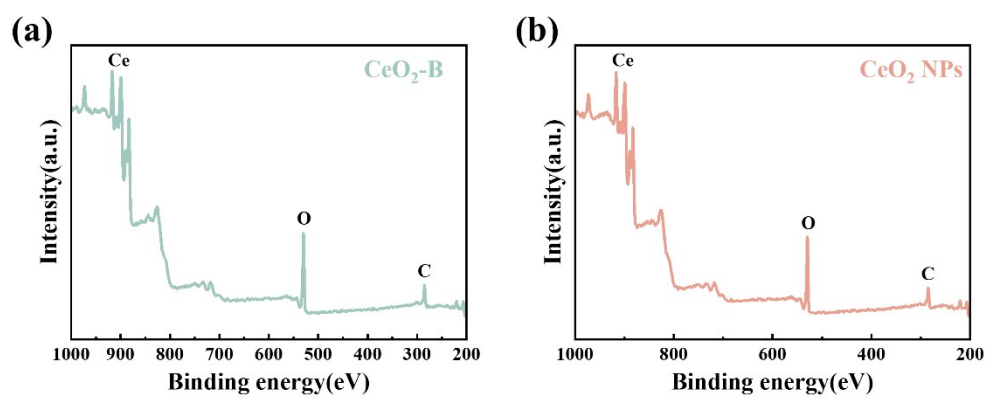

**Fig. S3** XPS survey spectra of  $\text{CeO}_2$  NPs and  $\text{CeO}_2\text{-B}$ .

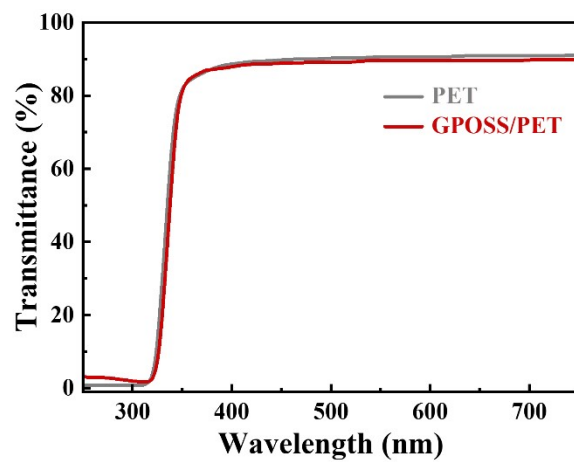

**Fig. S4** UV-vis transmittance spectra of GPOSS on the PET films and pristine PET.

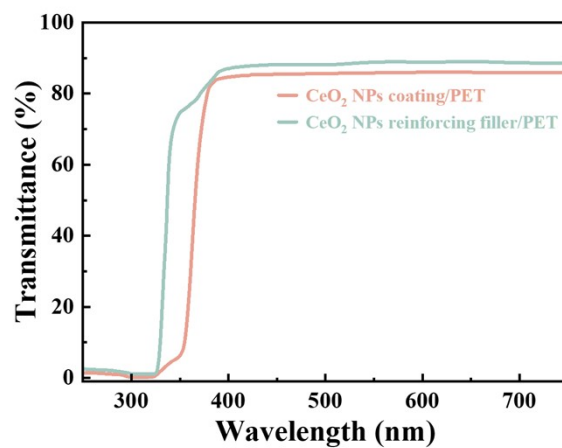

**Fig. S5** UV-vis transmittance spectra of CeO<sub>2</sub> NPs coating and reinforcing filler (2000 ppm).

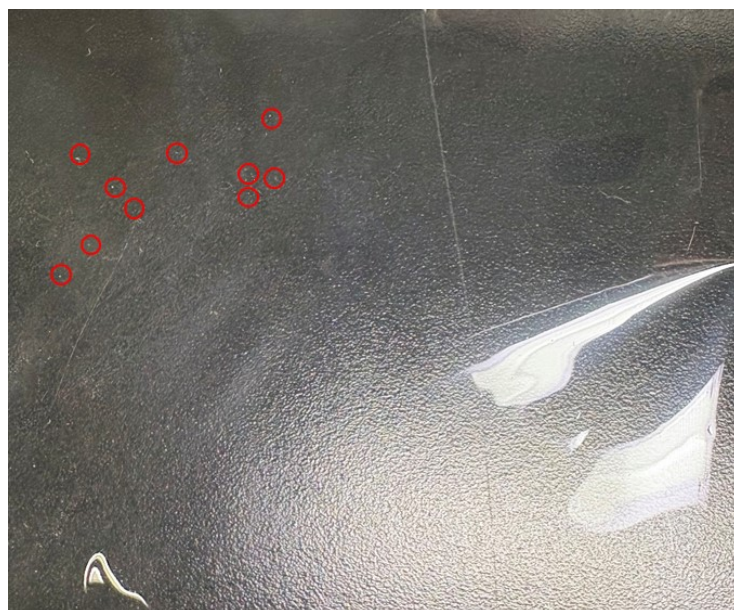

**Fig. S6** Surface defects (pinholes and agglomerates) observed on the CeO<sub>2</sub> NPs reinforcing filler/PET film.

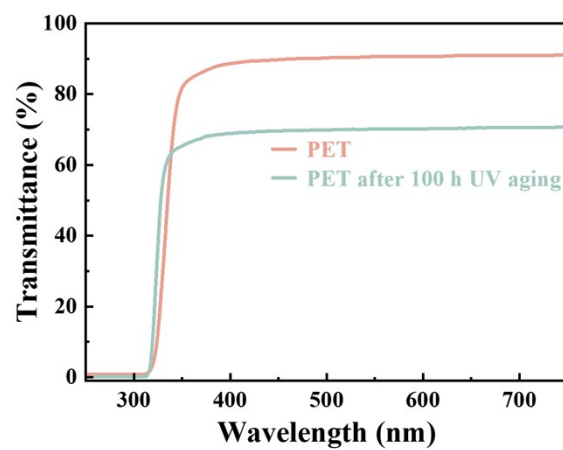

**Fig. S7** UV-vis transmittance spectra of pristine PET film before and after 100 h UV aging.

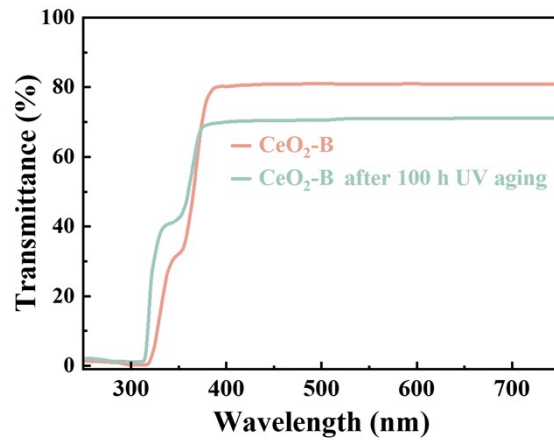

**Fig. S8** UV-vis transmittance spectra of CeO<sub>2</sub>-B coating on PET film before and after 100 h UV aging.

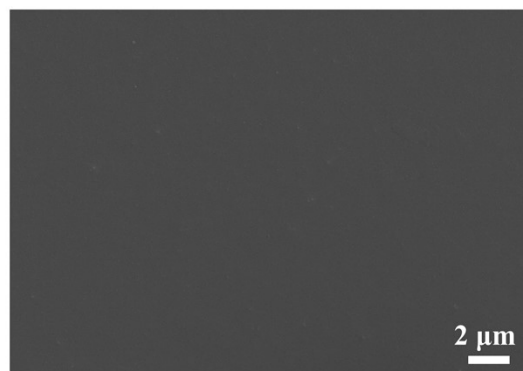

**Fig. S9** SEM image of CeO<sub>2</sub> NPs/PET after immersed in deionized water for 10 days.

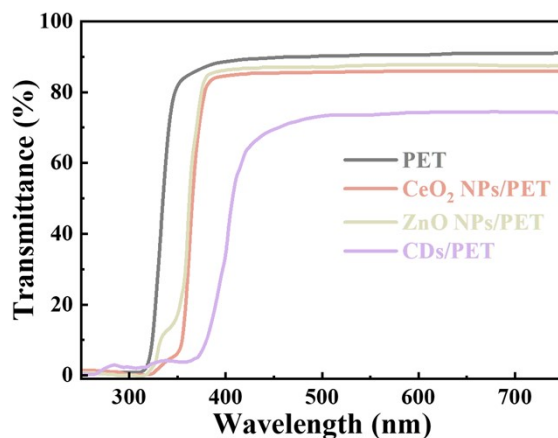

**Fig. S10** UV-vis transmittance spectra of CeO<sub>2</sub> NPs, ZnO NPs and CDs coatings on PET films.

## References

- 1 Q. Zheng, J. Huang, H. Li, L. Chen, *Ceram. Int.*, 2019, 45, 3729-3734.
- 2 Y. Gao, H. Gui, J. Xu, R. Shen, L. Wei, X. Zhao, S. Zuo, J. Xu, X. Li, C. Yao, *React. Funct. Polym.*, 2025, 212, 106249.
- 3 D. Yang, A.G. Ramu, D. Choi, *Catalysts*, 2022, 12, 1590.
- 4 T. Kang, L. Tang, J. Qu, *Coatings*, 2018, 8, 411.
- 5 N. Bouazizi, A. Abed, S. Giraud, A. El Achari, C. Campagne, M.N. Morshed, O. Thoumire, R. El Moznine, O. Cherkaoui, J. Vieillard, *Phys. E*, 2020, 118, 113905.
- 6 M.Z. Khan, H. Taghavian, J. Wiener, J. Militky, Y. Wang, B. Tomkova, M. Cernik, L. Dvorak, *Surf. Interfaces*, 2024, 55, 105336.
- 7 H. Sliman, X. Dong, T. Zhao, *J. Colloid Interface Sci.*, 2020, 565, 360-367.
- 8 B. Bao, Y. Sun, X. Li, L. Li, Y. Yu, *FlatChem*, 2023, 39, 100494.
- 9 Y. Sun, G. Li, R. Zhong, *RSC Adv.*, 2025, 15, 26266-26275.
- 10 M. Aklalouch, A. Calleja, X. Granados, S. Ricart, V. Boffa, F. Ricci, T. Puig, X. Obradors, *Sol. Energy Mater. Sol. Cells*, 2014, 120, 175-182.
